# Supplementary material for: All at once: a sstR2-targeted radiohybrid theranostic agent for PET imaging and β- therapy with excellent preclinical performance
Source: Research Square preprint supplement (doi:10.21203/rs.3.rs-8090442/v1), 2025-12-04
Supplement: Supplementary file 1 [file 56040b535fb773ca530a30ab.docx]

**Supplementary Information**

*All at once:* a sstR2-targeted radiohybrid theranostic agent for PET imaging and β- therapy with excellent preclinical performance

Sandra Deiser1,2,§, Sebastian Fenzl1,3,§, Victor König1, Shigeyoshi Inoue3,* and Angela Casini1,2,***

*1 Chair of Pharmaceutical Radiochemistry, Department of Chemistry, School of Natural Sciences, Technical University of Munich, Walther-Meißner-Str. 3, 85748 Garching b. München, Germany*

*2 Chair of Medicinal and Bioinorganic Chemistry, Department of Chemistry, TUM School of Natural Sciences, Technical University of Munich, Lichtenbergstr. 4, 85748 Garching b. München, Germany*

*3 Chair of Silicon Chemistry, School of Natural Sciences, Technical University of Munich, Lichtenbergstr. 4, 85748 Garching b. München, Germany*

§ Equal contribution

*Corresponding authors: [angela.casini@tum.de](mailto:angela.casini@tum.de); [s.inoue@tum.de](mailto:s.inoue@tum.de)

# **List of Abbreviations**

To simplify the nomenclature of the SST-ligands, the three-letter code was used to describe the amino acids.

| 2-CTC | 2-Chlorotrityl chloride |
| --- | --- |
| DCM | Dichloromethane |
| DIPEA | *N*,*N*-diisopropylethylamine |
| DMEM | Dulbecco’s modified Eagle’s medium |
| DMF | Dimethylformamide |
| DMSO | Dimethyl sulfoxide |
| DOTA(*t*Bu)3 | 1,4,7,10-Tetraazacyclododecane-1,4,7,10-tetraacetic acid 1,4,7-tri-tert-butyl |
| DOTA(*t*Bu)2 | *trans*-(di-*tert*-butyl)-1,4,7,10-tetraazacyclododecane-1,4,7,10-tetraacetic acid |
| DOTA-GA | 2-[1,4,7,10-Tetraazacyclododecane]-pentanedioic acid |
| ESI‑MS | Electrospray ionization mass spectrometry |
| FBS | Fetal bovine serum |
| Fmoc | Fluorenylmethoxycarbonyl |
| HATU | Hexafluorophosphate azabenzotriazole tetramethyl uronium |
| HBSA | Hank’s balanced salt solution + 1% bovine serum albumine |
| HBSS | Hank’s balanced salt solution |
| HOAt | 1-Hydroxy-7-azabenzotriazole |
| HSA | Human serum albumin |
| *IC*50 | Half maximal inhibitory concentration |
| log*D*7.4 | Octanol-PBS7.4 partition coefficient |
| MeCN | Acetonitrile |
| MeOH | MeOH |
| NMP | 1-Methylpyrrolidin-2-one |
| O2Oc | 8-Amino-3,6-dioxaoctanoic acid |
| PBS | Phosphate-buffered saline |
| RCC | Radiochemical conversion |
| RCP | Radiochemical purity |
| RCY | Radiochemical yield |
| RP‑HPLC | Reverse phase high performance liquid chromatography |
| SPPS | Solid-phase peptide synthesis |
| sst | Somatostatin |
| *t*R | Retention time |
| TBTU | 2-(1-H-Benzotriazole-1-yl)-1,1,3,3-tetramethylaminium tetrafluoroborate |
| TFA | Trifluoroacetic acid |
| TIPS | Triisopropylsilane |

**Experimental Section**

***General***

The solvents were obtained technical or in HPLC‑grade from *Sigma‑Aldrich* *(Munich, Germany*), *Alfa Aesar* (Karlsruhe, Germany), *Carl Roth GmbH & Co. KG* (Karlsruhe, Germany) or *VWR International GmbH* (Darmstadt, Germany). The water for the HPLC solvents was supplied by the in-house Millipore *Barnsted MicroPure‑*System from *Thermo Fischer Scientific Inc.* (Morrisville PA, USA). The *Ultrapur®* water and DMSO (anhydrous) were purchased from *Sigma Aldrich* (Munich, Germany)*.* Synthesis of *(SiFA)SeFe* was performed according to established procedures.[1] Chemicals for liquid phase synthesis and deuterated solvents were obtained from *VWR International GmbH* (Darmstadt, Germany), *Carl Roth GmbH & Co. KG* (Karlsruhe, Germany, *Tokyo Chemical Industry* (Tokio, Japan)*, Gelest Inc.* (Morrisville PA, USA), and *Sigma‑Aldrich* *(Munich, Germany*) and used without further purification. Amino acids were sourced from *Carbolution Chemicals GmbH* (St. Ingbert, Germany), *IRIS Biotech GmbH* (Marktredewitz, Germany), *Millipore-Sigma HGaA* (Darmstadt, Germany) or *Sigma Aldrich* (Munich, Germany). The Chelator DOTA(*t*Bu)3 was obtained from *CheMatech* (Dijon, France). Coupling reagents as well as other chemicals required for peptide synthesis were acquired from *Macrocyclics Inc.* (Dallas, USA), *Molekula GmbH* (Garching, Germany) or *Sigma Aldrich* (Munich, Germany). The 2-CTC-resin was purchased from *IRIS Biotech GmbH* (Marktredewitz, Germany). Thallium(III) trifluoroacetate, glycerol, imidazole, and hydroxylammonium chloride were purchased from *Sigma Aldrich* (Munich, Germany). All reagents were used without further purification. Cell culture media DMEM/F‑12 (1:1) + GlutaMAX™-I and RPMI medium 1640 were purchased from *Thermo Fisher Scientific* (Waltham, Massachusetts, USA). Media additives such as fetal bovine serum (FBS), l‑Gln solution (200 mm), and MEM non‑essential amino acid solution were acquired from *Bio&SELL* (Nürnberg, Germany) and *Sigma Aldrich* (Munich, Germany), respectively. Hanks’ balanced salt solution (HBSS), Phosphate-Buffered Saline pH = 7.4 (PBS) and Trypsin/EDTA (0.05%/0.02% in PBS without Ca2+/Mg2+) were purchased from *Sigma Aldrich* (Munich, Germany). Bovine serum albumin (BSA) and Trypan Blue (0.4%) were purchased from *Biowest* (Nuaillé, France).

*Radionuclides and Materials for radioactive labelling and evaluation*

Radioactive labelling with Iodine-125 for affinity studies was performed with a [125I]NaI-solution in 40 mm NaOH (74 TBq/mM) from *HARTMANN ANALYTIC GmbH* (Braunschweig, Germany). Iodogen for the synthesis was purchased from *Pierce™ Biotechnology* (Rockford Il, United States). Radioactive labelling solution with fluorine‑18 in target water ([18O]H2O) was supplied by *Klinikum rechts der Isar* (Munich,Germany). For 177Lu-labelling, a solution of [177Lu]LuCl3 (1 GBq) Radiochemical Grade EndolucinBeta® n.c.a. (40 GBq/mL) in 0.04 m HCl was acquired from *ITM Isotope Technologies Munich SE* (Munich, Germany). The Cartridges for 18F-labelling were supplied by *Waters GmbH* (Eschborn, Germany). Protein LoBind® tubes were purchased from *Eppendorf SE* (Hamburg, Germany). Silica gel 60 coated aluminum stripes and iTLC‑SG stripes and for reaction controls were obtained from *Agilent* (Santa Clara, California, USA) and *Merck KGaA* (Darmstadt, Germany), respectively. The 24-well plates for *IC*50 studies were supplied from *Thermo Scientific Inc.* (Waltham, Massachusetts, USA) and sterile cell culture flasks were acquired from *Greiner Bio-One GmbH* (Frickenhausen, Germany). Centrifugal filters for stability studies in human serum were purchased from *VWR International GmbH* (Darmstadt, Germany).

*Instruments*

Analytical and preparative RP-HPLC was carried out on *Shimadzu Corp.* Instruments (Kyoto, Japan) equipped with two LC-20AD gradient pumps, a CBM-20A communications module and a Smartline UV detector 2500 (λ = 220 nm, λ = 254 nm) from *Dr. Ing. Herbert Knauer GmbH* (Berlin, Germany). For analytical RP-HPLC a flow rate of 1.0 mL/min was used. Quality controls of peptic ligands were performed on a MultoKrom® 100‑5 C18‑column (125 × 4.6 mm, 5 μm particle size, *CS Chromatographie GmbH*). Different gradients of MeCN (*J. T. Baker®* ultra-gradient HPLC rate, mixed with 5% H2O and 0.1% TFA) in H2O (0.1% TFA) were used as eluents for all RP-HPLC operations. Preparative HPLC was performed with a Multospher® 100 C18-column (150 × 10 mm, 5 μm particle size, *CS Chromatographie GmbH*) at a flow rate of 5.0 mL/min. Different gradients of MeCN (*J. T. Baker®* ultra-gradient HPLC rate, mixed with 5% H2O and 0.1% TFA) in H2O (0.1% TFA) were used as eluents for all RP‑HPLC operations. All RP‑HPLC chromatograms were analyzed *via* the *LabSolutions* software.

Radiolabelled compounds were investigated by analytical Radio-RP-HPLC from *Shimadzu Corp.* (Kyoto, Japan), comprising of two LC-20AD gradient pumps, a DGU-20A degassing unit, a SIL‑20A autosampler, a CTO-10AS column oven, a FRC-10A fraction collector, a SPD-20A UV/Vis detector (λ = 220 nm), a HERM LB500 (NaI-scintillation crystal) radio-detector (from the company *Berthold Technologies GmbH*, Bad Wilbad, Germany) and a CBM-20A communications module. For the characterization of radioactively labelled peptidic compounds, a Multospher® 100 C18-column (125 × 4.6 mm, 5 μm particle size, *CS Chromatographie GmbH*) was used.

Radioactive TLCs were analyzed using a Scan-RAM™ from *LabLogic* (Koblenz, Germany). The acquired data were processed using the Laura Software (Koblenz, Germany). For the quantification of the activities of radio-labelled compounds an automatic 2480 WIZARD2 γ counter from *PerkinElmer Inc.* (Waltham, USA) was used. For the quantification of some activities within *ex vivo* biodistribution studies with **[177Lu]Lu‑rhTATE4** an APEX y-counter with an GX4018 detector from *MIRION Technologies* (Atlanta, Georgia, USA) and a CP-5SL Cryo-Pulse® 5 Cryostat from *CANBERRA* (Toledo, Spain) was used. All activities were analyzed *via* the Apex‑Gamma software. The calibration curve was determined using Excel software (*Microsoft Corporation*, Redmond, WA, USA). ESI‑MS spectra are recorded on an expression CMS mass spectrometer with a quadrupole analyzer and an electron spray ionizer (positive mode) (*Advion Inc.*, Ithaca, New York, USA). All ESI‑MS spectra were analyzed *via* the *Advion Mass Express* software. Freeze‑drying was carried out on an Alpha 1.2 Lyophiliser from *Martin Christ Gefriertrocknungsanlagen GmbH* (Osterode im Harz, Germany) with a RZ-2 rotary vane pump from *Vacuubrand GmbH & Co. KG* (Wertheim, Germany). µSPECT/CT scans of mice were recorded on a VECTor4 small-animal SPECT/PET/OI/CT from *MILabs* (Utrecht, Netherlands). All Scans were analyzed *via* the PMOD software from *PMOD Technologies LCC* (Fällanden, Switzerland).

*General synthesis methods (GS)*

*Solid-phase peptide synthesis using Fmoc strategy (Fmoc-SPPS)*

The resin is loaded with a Fmoc-protected amino acid at the *C*-terminus. The Fmoc protecting group is then removed and coupled to the next amino acid using coupling reagents. After completion, the peptide is cleaved from the resin.

*GS1: Loading of the 2‑CTC resin*

The 2-chloro-tritylchlorid (2‑CTC) resin (loading capacity: 1.6 mmol/g) was swollen for 30 min in 5 mL NMP and then washed with DMF (6 × 5 mL). The resin was loaded with an Fmoc protected amino acid (AA) using Fmoc‑AA‑OH (1.5 eq.) and DIPEA (*N*,*N*‑Diisopropylethylamine) (1.5 eq.) in DMF (*N*,*N*-Dimethylformamide) in a 20 mL peptide syringe. After 15 min of pre‑activation at room temperature (RT), another 3.0 eq. of DIPEA was added and the mixture was shaken at RT for 2 h. MeOH (1 mL/g resin) was added to the resin and shaken for 15 minutes. Afterwards, the resin was washed five times each with DMF (5 mL), MeOH (5 mL) and DCM (5 mL) and dried in a desiccator.

*GS2: Standard peptide coupling to the resin*

The loaded resin is swollen in NMP for 30 min, washed six times with DMF (5 mL), and *N*-terminally Fmoc deprotected. Prior to coupling at the *C*-terminus of side-chain-protected Fmoc-AA-OH (1.5 eq.), preactivation is performed with TBTU (1.5 eq.), HOAt (1.5 eq.), and DIPEA (4.0 eq.) in 5 mL DMF. After 10 min, the activated solution is added to the resin-bound peptide containing the free amine (2-CTC-AA-NH2) and shaken for 1.5 h at RT. The resin is then washed six times with DMF (5 mL) and, after Fmoc deprotection, washed another six times with DMF (5 mL). Now the next amino acid can be reacted, or washed six times with DCM and dried in a desiccator.

*GS3: Deviating peptide coupling to the resin*

After swelling the resin in NMP for 30 min and washing with DMF (6 × 5 mL), the respective substrate is coupled to the resin-bound peptide (**Table S1**). The resin is then washed six times with DMF (5 mL).

*GS4: Fmoc deprotection*

*N*-terminal Fmoc-protected amino acids or peptides bound to the resin are deprotected by adding 20% piperidine in DMF (5 mL). The deprotection reagent is added twice (1×5 min, 1×15 min). The resin is then washed with DMF (6 × 5 mL each).

*GS5: Acetyl deprotection*

Acetyl deprotection is performed by dissolving 50 µmol of the peptide in MeOH and adding NaOMe until the pH is 11-12. After 15 min, the reaction is stopped by adding TFA (pH = 2).

*GS6: Cleavage from the resin with retention of acid labile protective groups*

The peptide bound to the resin is mixed with 5 mL of 2,2,2‑Trifluorethanol (TFE)/DCM/AcOH (3/6/1) and agitated for 20 min at RT. The solution with the protected peptide is collected and then evaporated under a nitrogen stream.

*GS7: Cleavage from the resin with removal of acid-labile protection groups*

The peptide bound to the resin is mixed with 5 mL of TFA/TIPS/H2O (95/2.5/2.5) and agitated two times for 45 min at RT. The solution with the deprotected peptide is collected in a 50 mL round-bottom flask and the remaining resin is washed once with 5 mL TFA and stirred overnight. The following day, the TFA is evaporated under nitrogen stream.

*Synthesis of cold metal complexes*

*GS8: Complexation with lutetium*

For the incorporation of lutetium, LuCl3 (20 mM in H2O, 3.0 eq.) is added to a 2 mm solution of the compound in DMSO and diluted to 1 mm by addition of DMSO. The obtained solution is incubated at 80 ⁰C for 15 min.

*GS9: Synthesis of the binding motif TATE on resin with protecting groups (PG) (H‑TATE(PG)‑2‑CT)*

The synthesis of H‑TATE(PG)‑2‑CT is carried out on the resin using the general working procedures (**GS**). 2‑CTC resin is loaded with Fmoc‑*l*‑Thr(*t*Bu)‑OH (**GS1**). This is followed by the coupling of Fmoc‑*l*‑Cys(Acm)-OH, Fmoc‑*l*‑Thr(*t*Bu)-OH, Fmoc‑*l*‑Lys(Boc)‑OH, Fmoc‑*d*‑Trp(Boc)‑OH, Fmoc‑*l*‑Tyr(*t*Bu)‑OH, Fmoc‑*l*‑Cys(Acm)‑OH and Fmoc‑*d*‑Phe‑OH (**GS2**). Before the coupling of the next amino acid in each case, the *N*‑terminus is Fmoc‑deprotected (**GS4**). The final amino acid is only deprotected after the formation of the disulfide bridge.

*Formation of the disulfide bridge*

Fmoc-*d*-Phe-*l*-Cys(Acm)-*l*-Tyr(tBu)-*d*-Trp(Boc)-*l*-Lys(Boc)-*l*-Thr(*t*Bu)-*l*-Cys(Acm)-*l*-Thr(*t*Bu)-2-CT (1.0 eq.) is mixed with Tl(TFA)3 (4.0 eq.) and glycerol (4.0 eq.) in DMF (8 mL/g resin). After 1 h at RT, the solution is discarded and a fresh solution of the reaction solution is added to the resin for another 1 h at RT. The resin is then washed with DMF (6 × 5 mL/g resin). Test cleavage from the resin with retention of acid labile protective groups is used to verify the completeness of the cyclization (**GS6**). Characterization is investigated by analytical RP‑HPLC and ESI‑MS. After final Fmoc deprotection, the product, H-*d*-Phe-cyclo[*l*-Cys-*l*-Tyr(*t*Bu)-*d*-Trp(Boc)-*l*-Lys(Boc)-*l*-Thr(*t*Bu)-*l*-Cys]-*l*-Thr(*t*Bu)-2-CT is present bound to the resin.

**RP‑HPLC** (10-90% MeCN/H2O with 0.1% TFA, *v*/*v*, 15 min, λ = 220 nm) for H‑TATE(PG)‑OH: *t*R = 13.4 min.

**MS** (ESI positive): m/z calculated for H‑TATE(PG)‑OH: 1416.7; found: 1418.3 [M + H+]+.

*Synthesis of SiFAlin-TATE*

The synthesis of SiFA*lin*-TATE is carried out on resin using the general working procedures (**GS**). The resin-bound synthesis of H‑TATE(PG)‑2‑CT (**GS9**) is followed by the coupling of Fmoc‑O2Oc‑OH (**GS3**), Fmoc-l-Asp(O*t*Bu)-OH (**GS3**), Fmoc‑l‑Asp(O*t*Bu)-OH (**GS2**), Fmoc‑Asn(Ac3AcNH‑*β*‑Glc)-OH (**GS3**) and *bis*‑Boc‑amino-oxyacetic acid (**GS3**). Before the coupling of the next amino acid in each case, the *N*-terminus is Fmoc‑deprotected (**GS4**). After resin cleavage, removal of all protecting groups (**GS7**) and acetyl deprotection (**GS5**), purification is carried out by RP‑HPLC (30‑35% MeCN/H2O with 0.1% TFA, *v*/*v*, 20 min, λ = 220 nm).

*Oximligation*

1.0 eq. TATE‑O2OC‑*l*‑Asp‑*l*‑Asp‑Asn‑amino‑oxy‑acid and 4.0 eq. SiFA*lin* aldehyde in 400 µL phosphate buffer/MeCN (1/1, *v*/*v*) are vesified with 4 N NaOH solution until a pH of pH = 4 is established. After 20 min the solution is diluted 1/1 with H2O (+0.1% TFA) and purified by RP-HPLC (20‑45‑60% MeCN/H2O with 0.1% TFA, *v*/*v*, 10-30 min, λ = 220 nm), 3.41 mg (1.52 μmol, 5%) is obtained in the form of a white solid.

**RP‑HPLC** (10-60% MeCN/H2O with 0.1% TFA, *v*/*v*, 15 min, λ = 220 nm) for SiFA*lin*‑TATE: *t*R = 13.5 min.

**MS** (ESI positive): m/z calculated for SiFA*lin*-TATE: 2241.9, found: 1082.5 [M + H+]+.

*Synthesis of Lu-DOTA‑TATE*

The synthesis of Lu-DOTA‑TATE is carried out on resin using the general working procedures (**GS**). The resin-bound synthesis of H‑TATE(PG)‑2‑CT (**GS9**) is followed by the coupling of DOTA(tBu)3 (**GS3**). After resin cleavage, removal of all protecting groups (**GS7**) and purification by RP‑HPLC (15‑40% MeCN/H2O with 0.1% TFA, *v*/*v*, 30 min, λ = 220 nm), 1.11 mg (7.73 μmol, 19%) DOTA‑TATE is obtained in the form of a white solid. Afterwards, the incorporation of lutetium (**GS8**) was performed.

**RP‑HPLC** (10‑60% MeCN/H2O with 0.1% TFA, *v*/*v*, 15 min, λ = 220 nm) for Lu‑DOTA‑TATE: *t*R = 8.5 min.

**MS** (ESI positive): m/z calculated for Lu‑DOTA-TATE: 1606.5, found: 804.6 [M + 2H+]2+.

*Synthesis of Lu-rhTATE4*

The synthesis of **rhTATE4** is carried out on resin using the general working procedures (**GS**). The resin-bound synthesis of H‑TATE(PG)‑2‑CT (**GS9**) is followed by the coupling of Fmoc‑O2Oc‑OH (**GS3**), Fmoc‑(SiFA)SeFe‑OH (**GS3**), Fmoc‑d‑Asp‑O*t*Bu (**GS3**) and DOTA(*t*Bu)3 (**GS3**). Before the coupling of the next amino acid in each case, the *N*-terminus is Fmoc‑deprotected (**GS4**). After resin cleavage, removal of all protecting groups (**GS7**) and purification by RP‑HPLC (30‑50% MeCN/H2O with 0.1% TFA, *v*/*v*, 30 min, λ = 220 nm), 4.08 mg (2.05 μmol, 3%) is obtained in the form of a white solid. Afterwards the incorporation of lutetium (**GS8**) takes place.

**RP‑HPLC** (10‑60% MeCN/H2O with 0.1% TFA, *v*/*v*, 15 min, λ = 220 nm) for Lu‑rhTATE4: *t*R = 13.0 min.

**MS** (ESI positive): m/z calculated for Lu-rhTATE4: 2159.8, found: 1081.0 [M + 2H+]2+.

***Radiolabelling***

*GS10: 18F-labelling*

For 18F-labelling, the aq. fluorine-18 (120 MBq) is retained on a SAX cartridge (Sep‑Pak Accel Plus QMA Carbonate Plus Light, 46 mg, Waters) preconditioned with 10 mL H2O. The cartridge is dried with air (10 mL), then washed slowly with dry DMSO (8 mL) and dried again with air (10 mL). The dried fluorine-18 is eluted with 500 µL ammonium formate (40.0 mg in 500 µL dry DMSO) into a 1.5 mL reaction tube (Protein LowBind, Eppendorf®). The reaction takes places by adding 30 µL (30 nmol) of the ligand (1 mm in DMSO) at 40 °C for 5 min. The reaction is stopped by adding 10 mL of PBS pH = 3 (pH = 3 adjusted with 1 m aq. HCl). The solution is then slowly loaded onto an Oasis HLB Plus Light cartridge (30 mg sorbent, 30 µm particle size) preconditioned with absolute EtOH (10 mL) and H2O (10 mL). The cartridge is washed with PBS pH = 7.4 (10 mL) and then dried with air (10 mL). The 18F‑labelled ligand is eluted using an elution cocktail of abs. EtOH and PBS pH = 7.4 (7/3 v/v; 300 µL). Quality controls are performed by analytical radio-RP-HPLC (MeCN/H2O: 10-60% with 0.1% TFA in 15 min) and radio-thin layer chromatography (flow agent: 60% MeCN/ 40% PBS (6/4 v/v) with 10% NaOAc in H2O (2 M) and 1% TFA, stationary phase: TLC silica gel 60 F254 from Merck Millipore).

***[18F]SiFAlin-TATE***

18F-labelling is carried out according to **GS10**. The formation of the desired product is confirmed by Radio-RP-HPLC and Radio-TLC.

**Radio-RP-HPLC** (MeCN/H2O: 10-60% with 0.1% TFA in 15 min): *t*R = 15.5 min, RCY [d.c.] = 59%, RCP = 98%.

**Radio-TLC** (flow agent: 60% MeCN/ 40% PBS (6/4 v/v) with 10% NaOAc in H2O (2 m) and 1% TFA, stationary phase: TLC silica gel 60 F254 from Merck Millipore): RCP = 98%.

***[18F]Lu-rhTATE4***

18F-labelling is carried out according to **GS10**. The formation of the desired product is confirmed by Radio-RP-HPLC and Radio-TLC.

**Radio-RP-HPLC** (MeCN/H2O: 10-60% with 0.1% TFA in 15 min): *t*R = 14.6 min, RCY [d.c.] = 38%, RCP = 99%.

**Radio-TLC** (flow agent: 60% MeCN/ 40% PBS (6/4 v/v) with 10% NaOAc in H2O (2 m) and 1% TFA, stationary phase: TLC silica gel 60 F254 from Merck Millipore): RCP = 99%.

*GS11: 177Lu-labelling*

For 177Lu-labelling, the aq. [177Lu]LuCl3 (30 MBq) is added to 1 µL (1 nmol) of the ligand (1 mm stock in DMSO), 10 µL of a NaOAc buffer (pH = 5.5), 22 µL 0.04 M HCl and reacted at 70 °C for 5 min.

***[177Lu]Lu‑DOTA-TATE***

177Lu-labelling is carried out according to **GS11**. The formation of the desired product is confirmed by Radio-RP-HPLC and Radio-TLC.

**Radio-RP-HPLC** (MeCN/H2O: 10-60% with 0.1% TFA in 15 min): *t*R = 8.5 min, RCY [d.c.] > 99%, RCP > 99%.

**Radio-TLC** (flow agent: 1 M NH4OAc/DMF (1/1, *v*/*v*), stationary phase: TLC silica gel 60 F254 from Merck Millipore): RCP > 99%.

**Radio-TLC** (flow agent: 0.1 M sodium citrate × 1.5 H2O, stationary phase: iTLC-SC from Merck Millipore): RCP > 99%.

***[177Lu]Lu‑rhTATE4***

177Lu-labelling is carried out according to **GS11**. The formation of the desired product is confirmed by Radio-RP-HPLC and Radio-TLC.

**Radio-RP-HPLC** (MeCN/H2O: 10-60% with 0.1% TFA in 15 min): *t*R = 11.9 min, RCY [d.c.] = 99%, RCP = 99%.

**Radio-TLC** (flow agent: 1 M NH4OAc/DMF (1/1, *v*/*v*), stationary phase: TLC silica gel 60 F254 from Merck Millipore): RCP > 99%.

**Radio-TLC** (flow agent: 0.1 M sodium citrate × 1.5 H2O, stationary phase: iTLC-SC from Merck Millipore): RCP = 99%.

*GS12: 125I-labelling*

*[125I]I-TOC*

For *in vitro* studies (*IC*50, n = 3), 50‑150 µg of TOC are dissolved in 20 µL of DMSO and 280 µL of TRIS buffer (25 mM TRIS‑HCl, 0.4 mM NaCl, pH = 7.5) in a 1.5 mL Eppendorf reaction tube (Protein LowBind). The solution is transferred to another reaction tube (1.5 mL, Protein LowBind) coated with Iodogen® (150 µg) and 5.00 µL of (10 - 20 MBq) [125I]NaI (74 TBq, 40 mM NaOH, *HARTMANN ANALYTIC GmbH* (Braunschweig, Germany)) is added. After 15 min at RT, the reaction is stopped by separation from the oxidant (Iodogen®) and the crude product is purified by analytical RP‑HPLC [(20‑40% in 15 min): *t*R = 5.1 min]. 10 vol% Na-ascorbate solution (100 mM in H2O, radiolysis quencher) is added to the resulting product solution. The concentration of [125I]I‑TOC is determined volumetrically by transferring the solution to a new vessel (20 mL reaction vessel) and the amount of [125I]I‑TOC contained is measured using an activimeter. The product obtained has a radiochemical yield of RCY (radio‑RP‑HPLC) = 42.9% and a radiochemical purity of RCP (radio‑RP‑HPLC) > 99%. Analysis of [125I]I‑TOC was performed by co‑injection of [natI]I‑TOC using a radio‑RP‑HPLC. [125I]I‑TOC is stored at −4 °C and can be used for up to three weeks.

**Radio‑RP‑HPLC** (20‑50% MeCN/H2O with 0.1% TFA, *v*/*v*, 20 min): *t*R = 5.1 min.

**Figures**

**HPLC chromatograms**


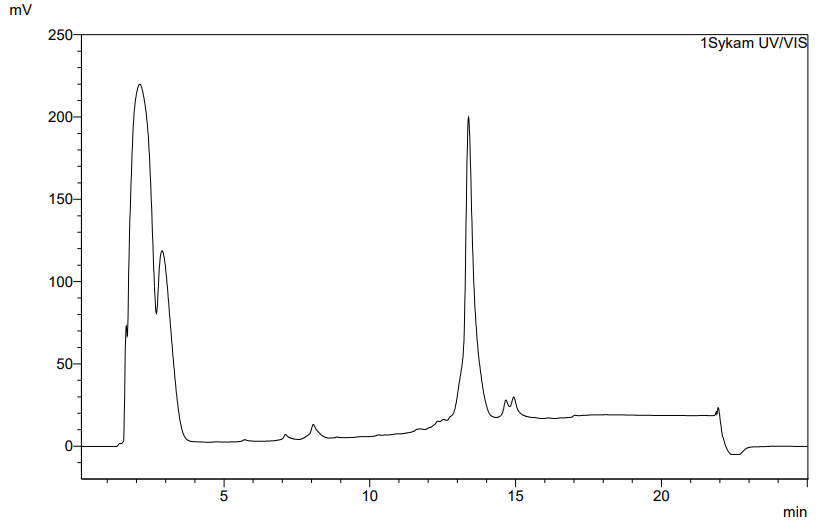


**Figure S1:** RP‑HPLC chromatogram of the reaction control of H‑TATE(PG)‑OH using the analytical control method 10‑90% B (15 min, λ = 220 nm, MultoKrom® 100‑5 C18‑column (125 × 4.6 mm, 5 μm particle size, CS Chromatographie GmbH, tR = 13.4 min).


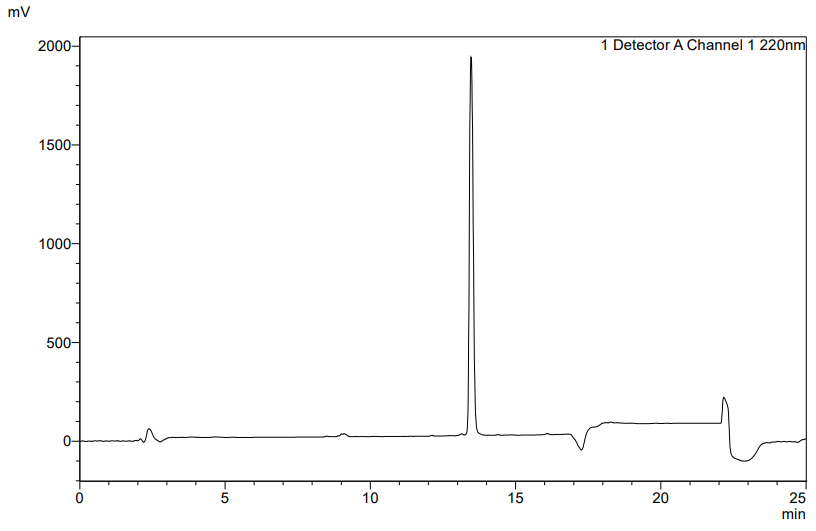


**Figure S2:** RP‑HPLC chromatogram of SiFAlin‑TATE using the analytical control method 10‑60% B (15 min, λ = 220 nm, MultoKrom® 100‑5 C18‑column (125 × 4.6 mm, 5 μm particle size, CS Chromatographie GmbH), tR = 13.5 min).


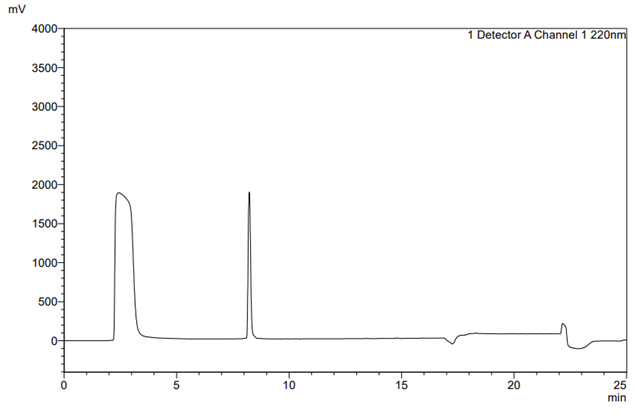


**Figure S3:** RP‑HPLC chromatogram of Lu-DOTA‑TATE using the analytical control method 10‑60% B (15 min, λ = 220 nm, MultoKrom® 100‑5 C18‑column (125 × 4.6 mm, 5 μm particle size, CS Chromatographie GmbH), tR = 8.5 min).


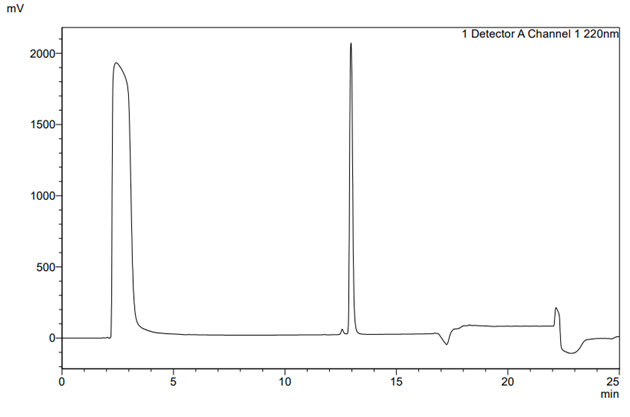


**Figure S4:** RP‑HPLC chromatogram of **Lu-rhTATE4** using the analytical control method 10‑60% B (15 min, λ = 220 nm, MultoKrom® 100‑5 C18‑column (125 × 4.6 mm, 5 μm particle size, CS Chromatographie GmbH), tR = 13.0 min).


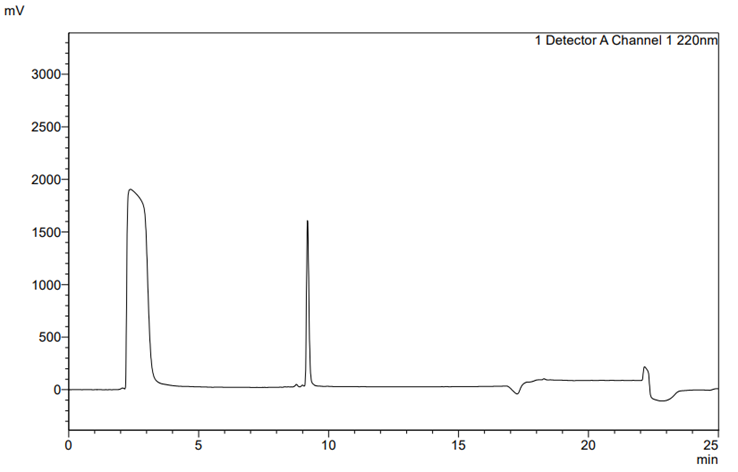


**Figure S5:** RP‑HPLC chromatogram of [natI]TOC using the analytical control method 10‑60% B (15 min, λ = 220 nm, MultoKrom® 100‑5 C18-column (125 × 4.6 mm, 5 μm particle size, CS Chromatographie GmbH), tR = 9.2 min).

# **Mass spectra**


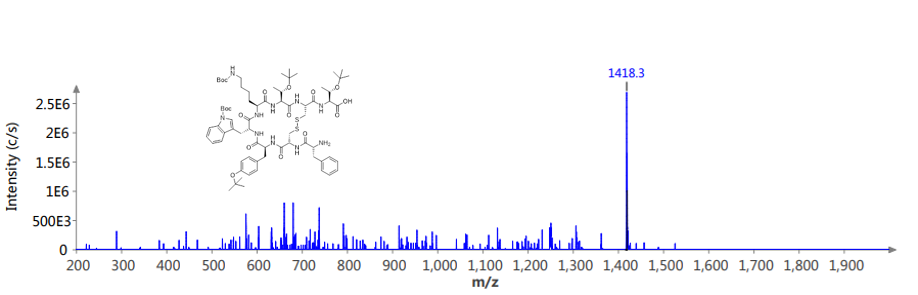


**Figure S6:** ESI+‑mass spectrum of H‑TATE(PG)‑OH.


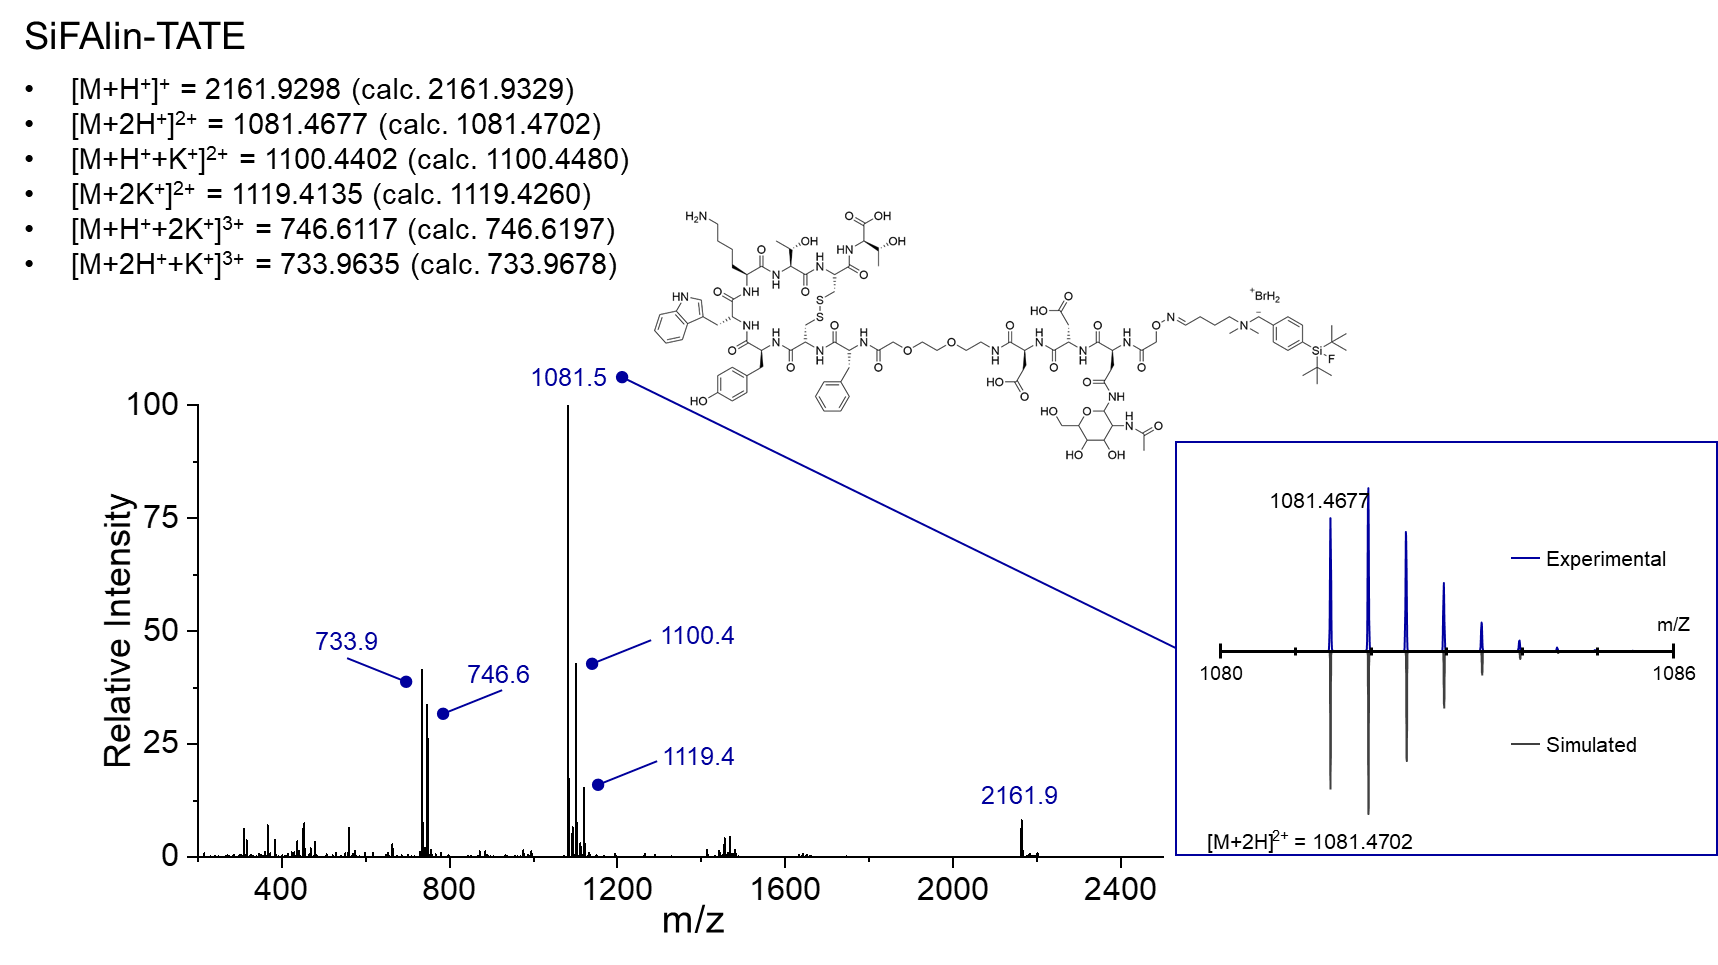


**Figure S7:** HR-ESI+ mass spectrum of SiFAlin-TATE.


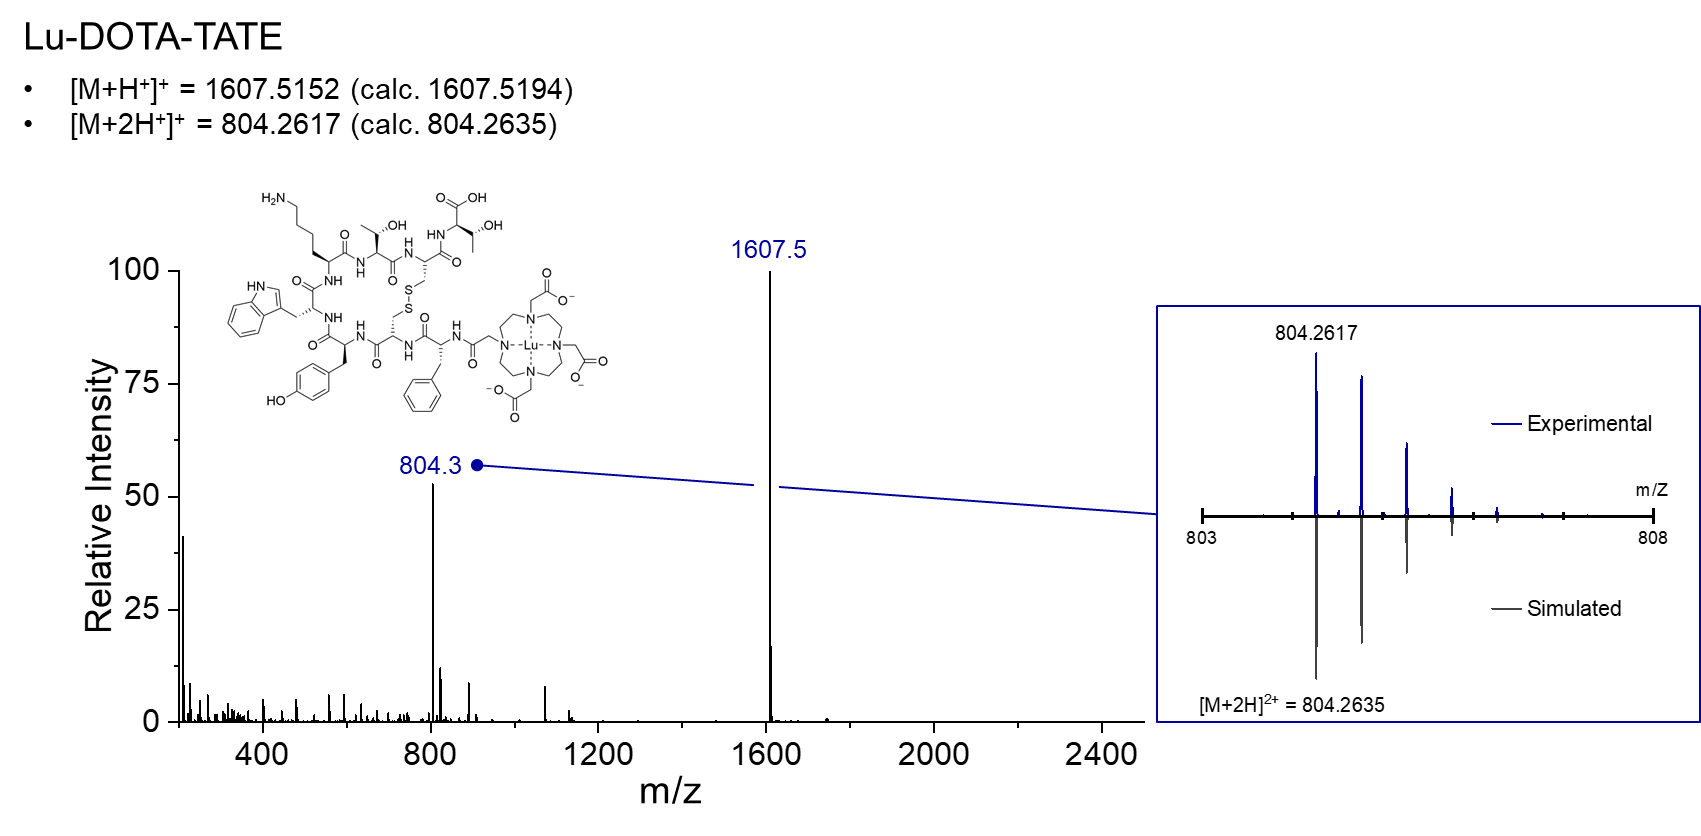


**Figure S8:** HR-ESI+ mass spectrum of Lu-DOTA‑TATE.


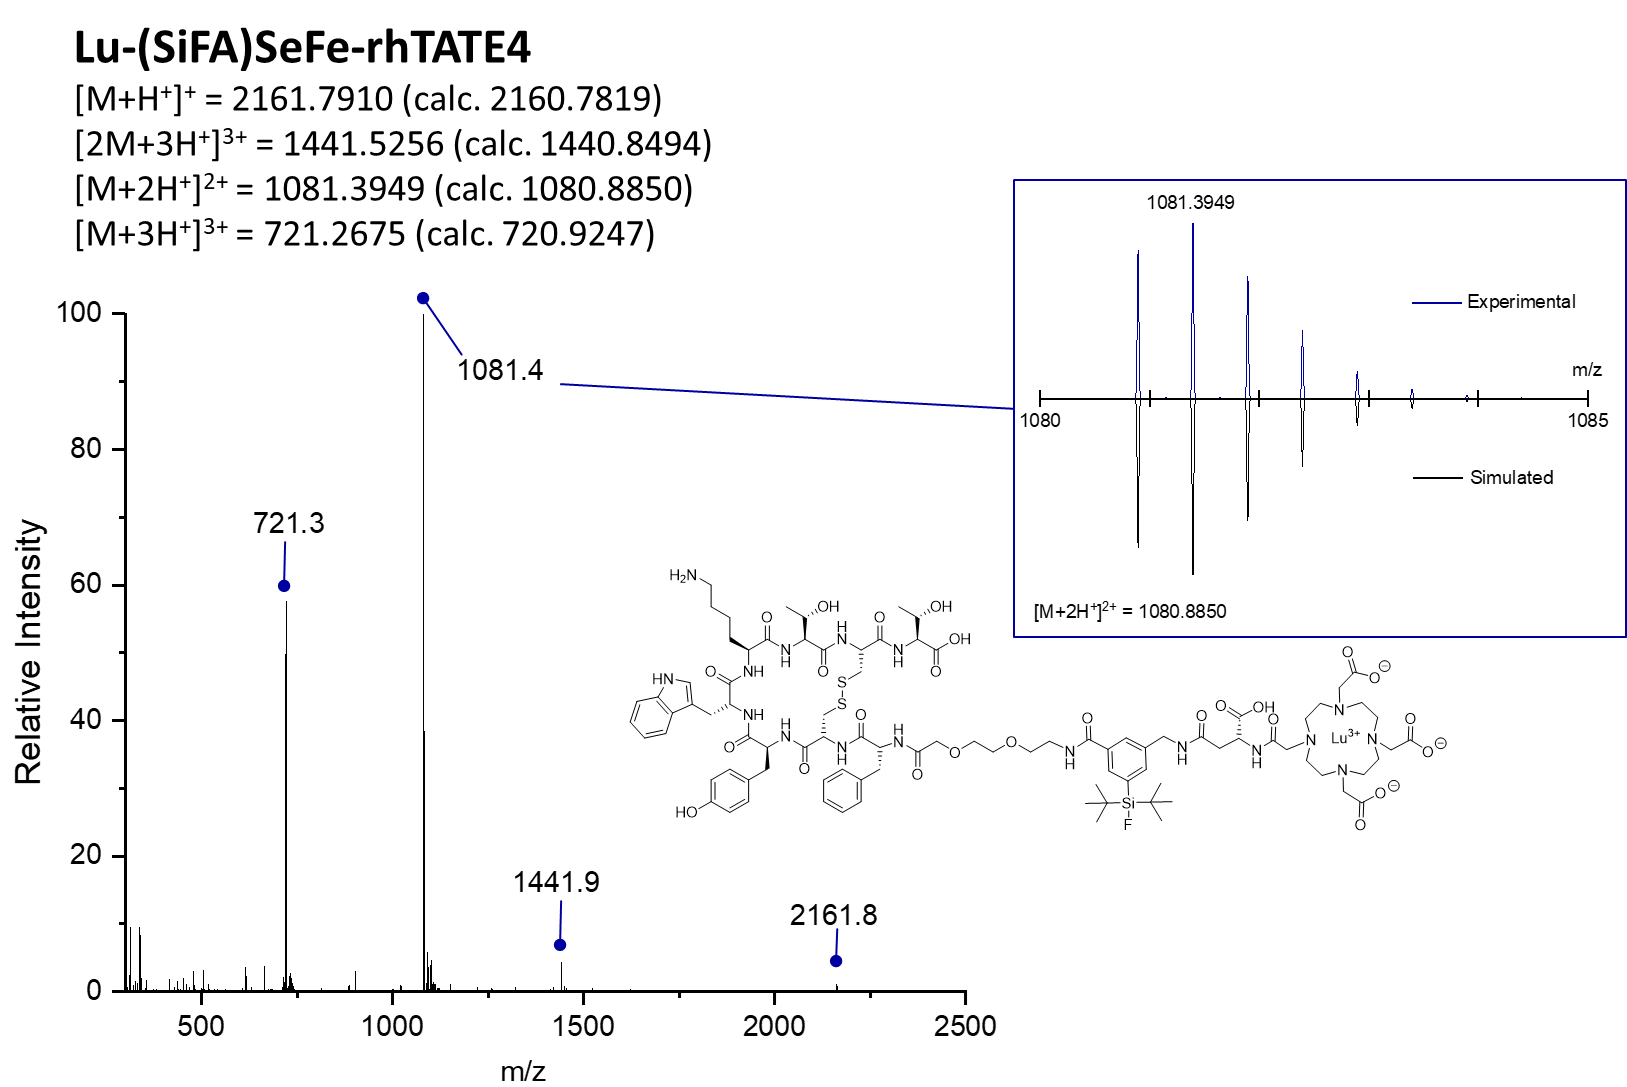


**Figure S9:** HR-ESI+ mass spectrum of **Lu-rhTATE4**.


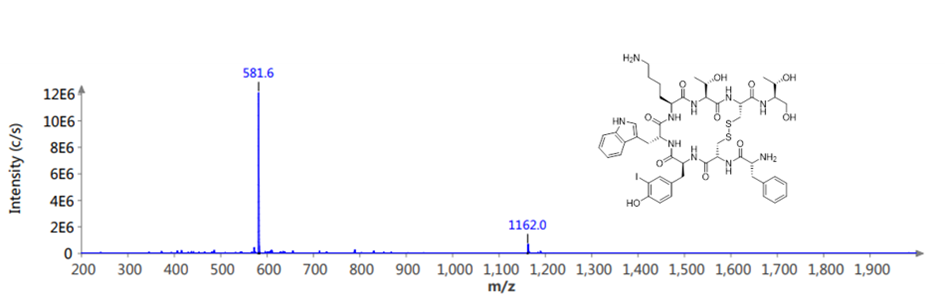


**Figure S10:** ESI mass spectrum of I-TOC.

## Radiochemical characterization

## Radio-RP-HPLC


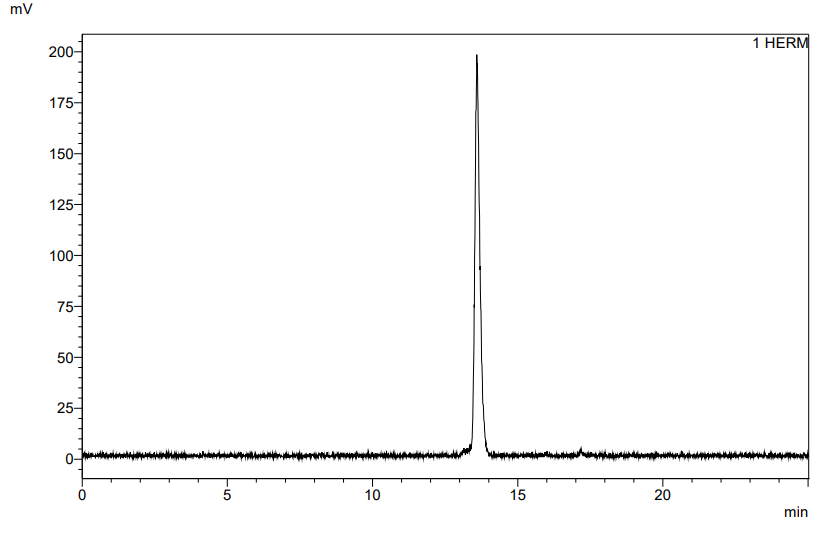


**Figure S11:** Radio‑RP‑HPLC chromatogram of [18F]SiFAlin-TATE using the analytical control method 10‑60% B (15 min, MultoKrom® 100‑5 C18-column (125 × 4.6 mm, 5 μm particle size, CS Chromatographie GmbH), tR = 13.6 min).


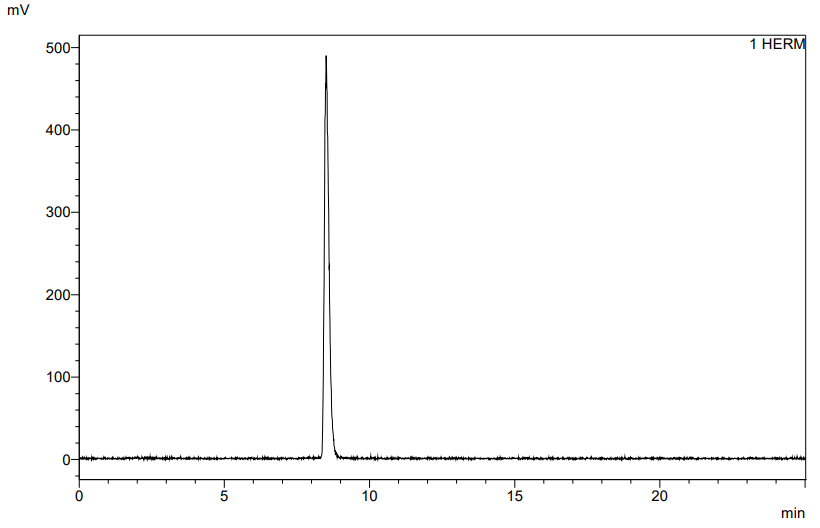


**Figure S12:** Radio‑RP‑HPLC chromatogram of [177Lu]Lu-DOTA-TATE using the analytical control method 10‑60% B (15 min, MultoKrom® 100‑5 C18-column (125 × 4.6 mm, 5 μm particle size, CS Chromatographie GmbH), tR = 8.5 min)**.**


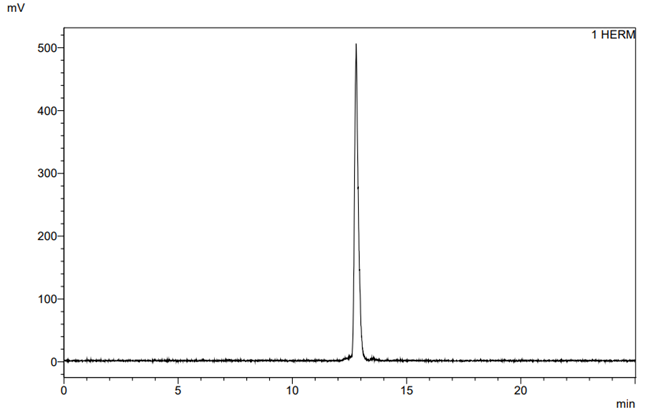


**Figure S13:** Radio-RP-HPLC chromatogram of **[18F]Lu-rhTATE4** using 10-60% B (125 × 4.6 mm, 5 μm particle size, CS Chromatographie GmbH), tR = 14.6 min)**.**


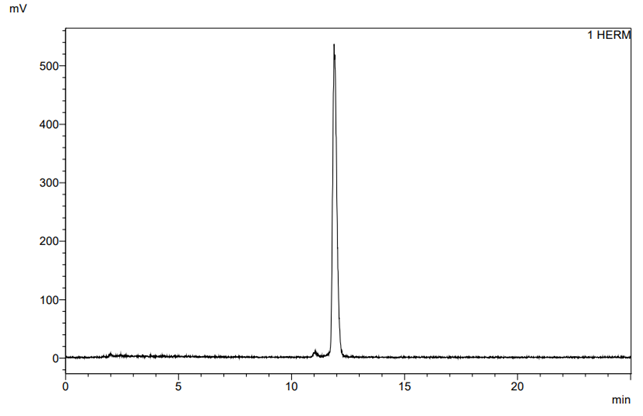


**Figure S14:** Radio-RP-HPLC chromatogram of **[177Lu]Lu-rhTATE4** using 10-60% B (125 × 4.6 mm, 5 μm particle size, CS Chromatographie GmbH), tR = 11.9 min)**.**


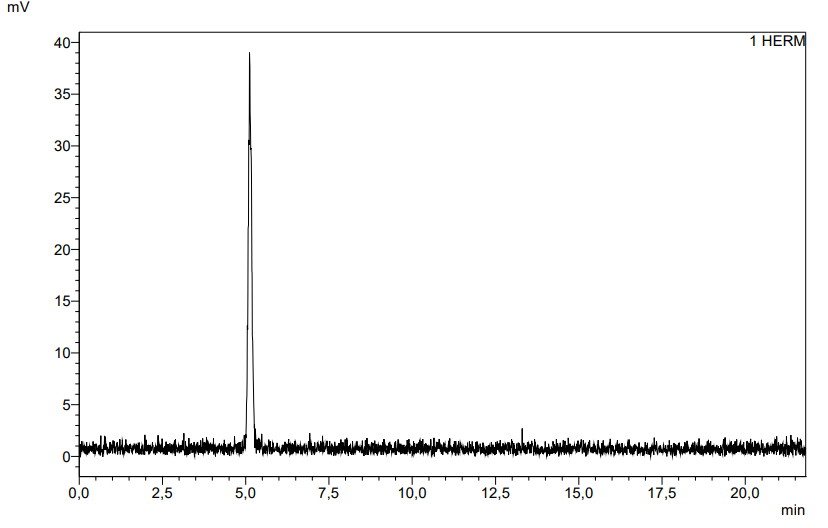


**Figure S15:** Radio‑RP‑HPLC chromatogram of [125I]TOC using the analytical control method 20‑50% B (15 min, MultoKrom® 100‑5 C18-column (125 × 4.6 mm, 5 μm particle size, CS Chromatographie GmbH), tR = 5.1 min).

## Radio-TLC


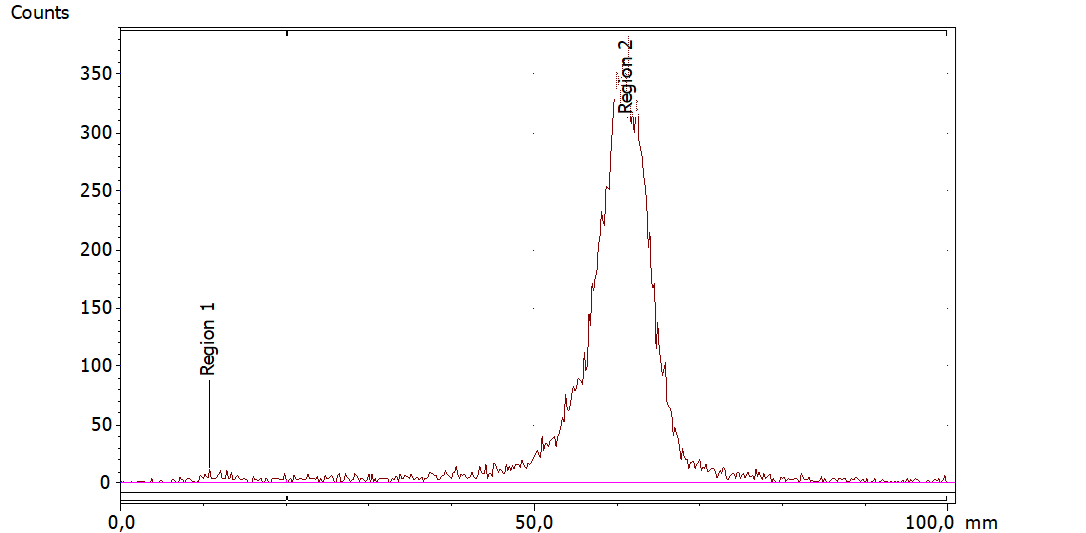


**Figure S16:** Radio‑TLC chromatogram of [18F]SiFAlin-TATE(flow agent: 60% MeCN/ 40% PBS (6/4 v/v) with 10% NaOAc in H2O (2 M) and 1% TFA, stationary phase: TLC silica gel 60 F254 from Merck Millipore).


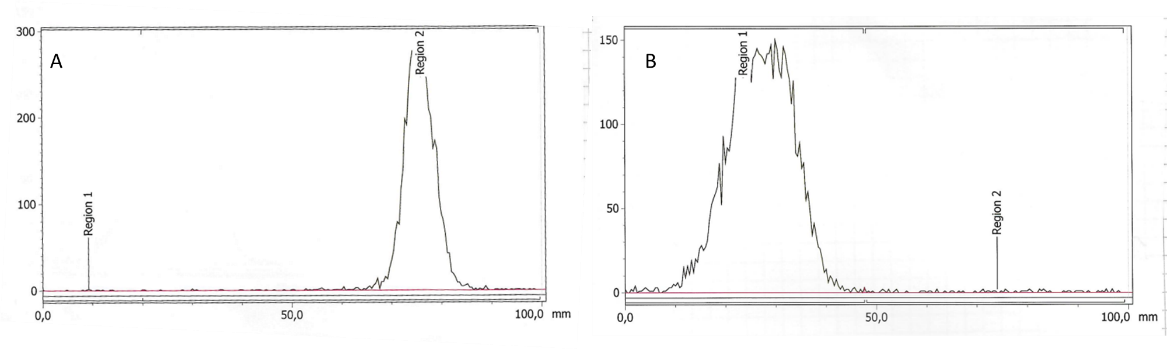


**Figure S17:** Radio-TLC chromatogram of [177Lu]Lu-DOTA-TATE using A: 1 M NH4OAc/DMF (1/1, v/v), stationary phase: TLC silica gel 60 F254 and B: 0.1 M sodium citrate × 1.5 H2O, stationary phase: iTLC‑SC.


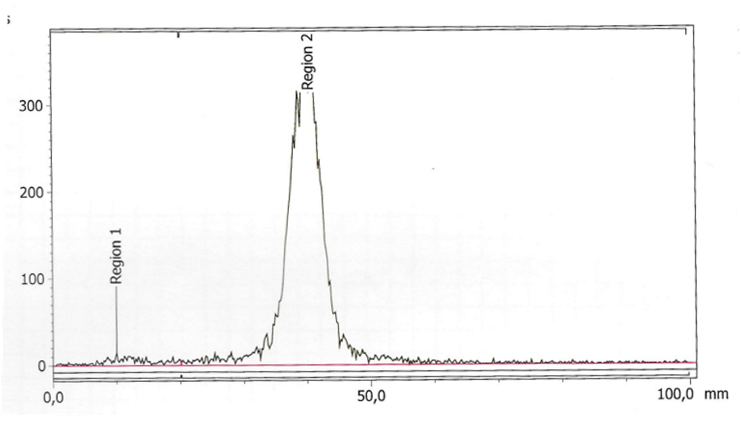


**Figure S18:** Radio‑TLC chromatogram of [18F]Lu-rhTATE4 using 60% MeCN/ 40% PBS (6/4 v/v) with 10% NaOAc in H2O (2 M) and 1% TFA, stationary phase: TLC silica gel 60 F254 from Merck Millipore.


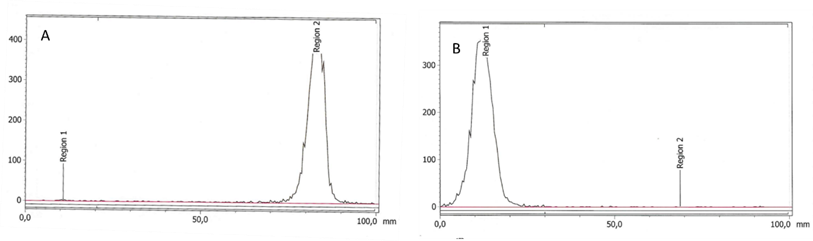


**Figure S19:** Radio‑TLC chromatogram of **[177Lu]Lu-rhTATE4** using A: 1 M NH4OAc/DMF (1/1, v/v), stationary phase: TLC Silica gel 60 F254 and B: 0.1 M sodium citrate × 1.5 H2O, stationary phase: iTLC‑SC.

***In vitro* and *in vivo* data**


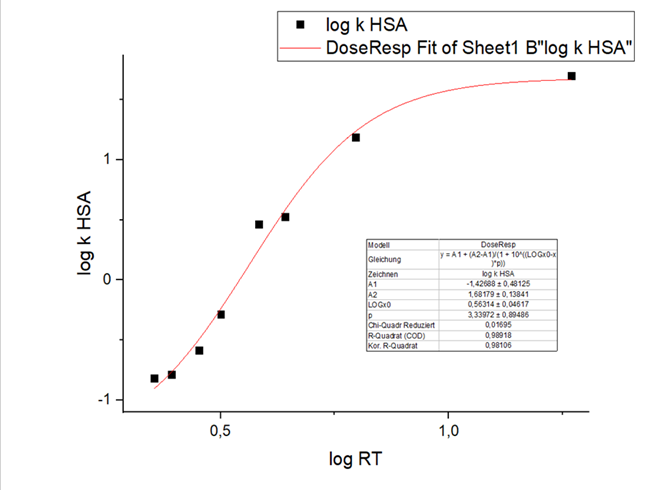


**Figure S20:** Fit function calculated by non-linear regression to determine the HSA binding.


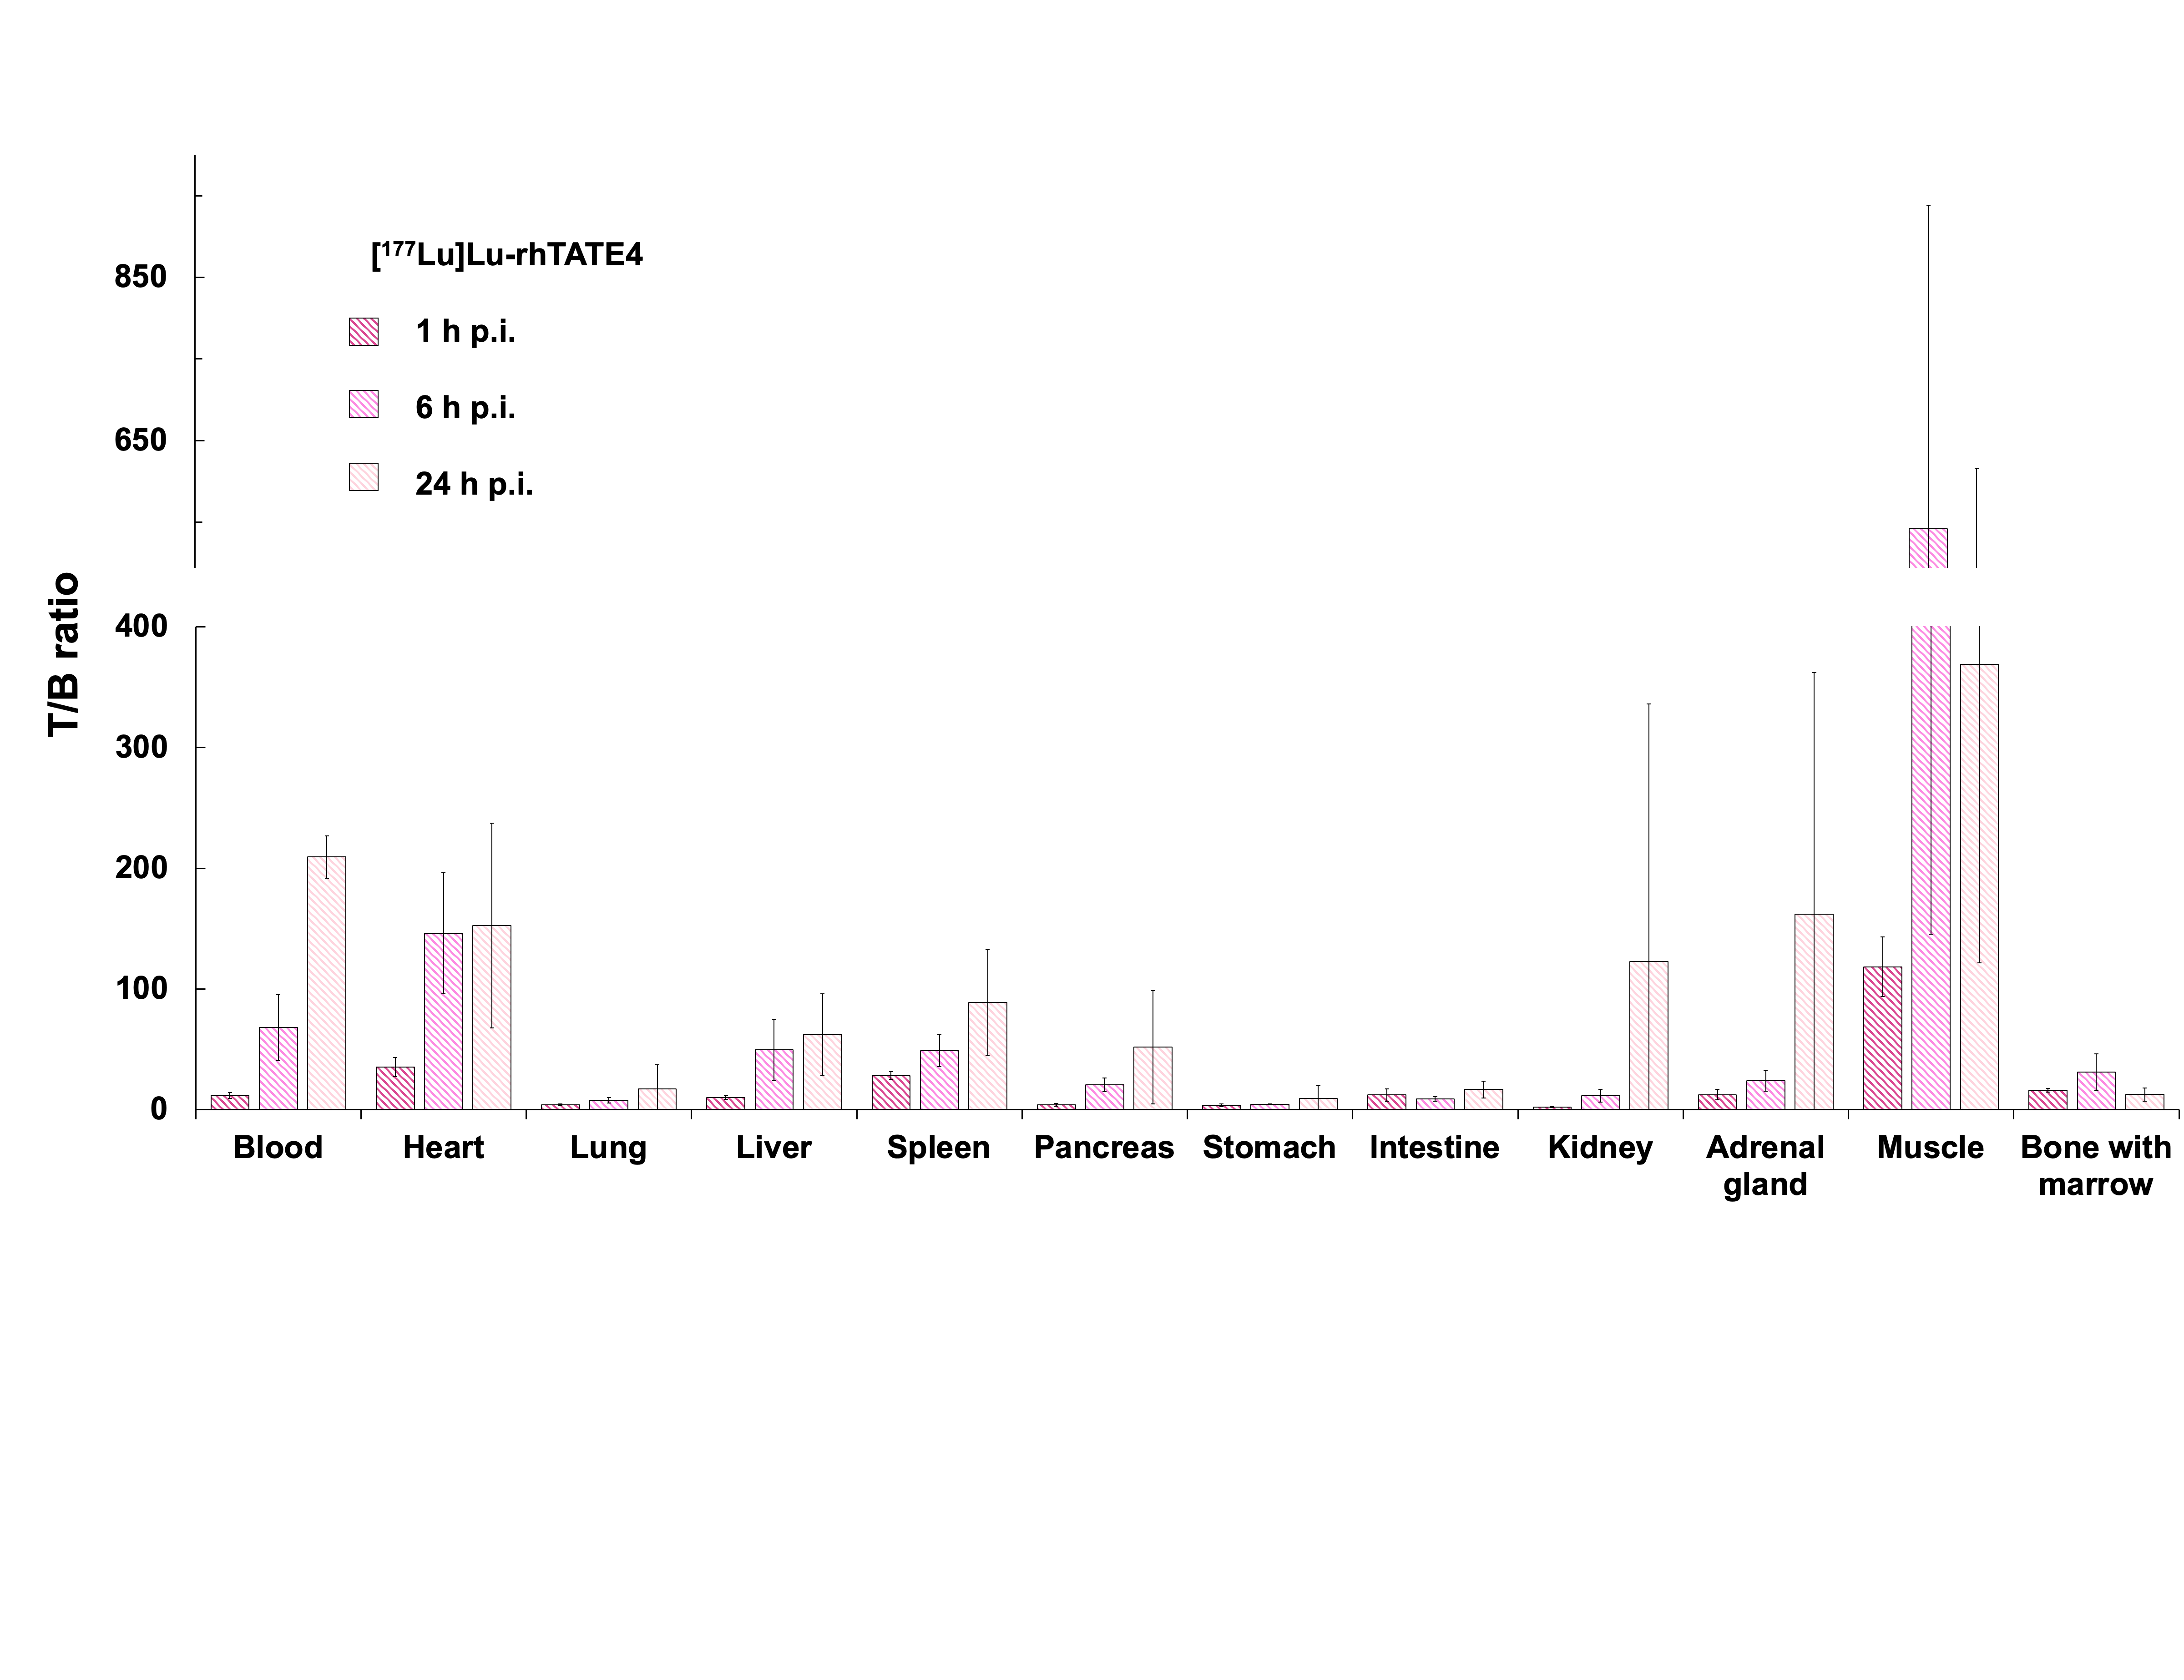


**Figure S21**: T/B-ratios of **[177Lu]Lu‑rhTATE4** at 1 h, 6 h and 24 h p.i. (300 pmol each).

**Tables**

**Table S1**: Deviating equivalents, coupling reagents, base (DIPEA), pre-activation times, and reaction times for coupling the respective substrates to the resin-bound peptide (1.0 eq.).

| Substrate | eq. | TBTU [eq.] | HATU  [eq.] | HOAt [eq.] | Base [eq.] | Preactivation [min] | Time [h] |
| --- | --- | --- | --- | --- | --- | --- | --- |
| Fmoc-O2Oc-OH | 2.0 | *-* | 1.9 | 1.9 | 2.0 | 15 | 1.5 |
| DOTA(*t*Bu)3 | 1.5 | *-* | 1.5 | 1.5 | 4.5 | 15 | 3.0 |
| Fmoc-*l*-Asp(*t*Bu)-OH | 3.0 | 3.0 | - | 3.0 | 9.0 | 2 | 2.0 |
| Fmoc‑Asn(Ac3AcNH‑*β*‑Glc)‑OH | 2.0 | 1.9 | 1.9 | *-* | 2.0 | 2 | 2.0 |
| *bis*-Boc-amino-oxyacetic acid | 2.0 | 1.9 | *-* | 1.9 | 2.0 | 2 | 2.0 |
| Fmoc-(SiFA)SeFe-OH | 1.5 | 1.5 | *-* | 1.5 | 3.5 | 15 | 2.0 |

**Table S2:** Compounds for the calibration curve and their respective literature-known HSA-binding percentages.[2-3]

| **Compound** | **HSA-binding [%]** |
| --- | --- |
| Benzyl alcohol | 13.15 |
| Aniline | 14.06 |
| Phenol | 20.69 |
| Benzoic acid | 34.27 |
| Carbamazepine | 75.00 |
| 4-Nitrophenol | 77.65 |
| Estradiol | 94.81 |
| Probenecid | 95.00 |
| Glibenclamide | 99.00 |

Nonlinear regression was performed using *OriginPro* *2016G* software. (Northampton, United States) using a fit function to calculate the HSA bindings of the examined compounds based on their retention time.

**Table S3**: Results of 18F‑/177Lu‑labelling reporting radiochemical conversion (RCC), radiochemical yield decay corrected (RCYd.c.), radiochemical purity *via* radio‑RP‑HPLC (RCPHPLC), and radiochemical purity *via* radio‑TLC (RCPTLC).

| Compound | RCC [%] | RCYd.c. [%] | RCPHPLC [%] | RCPTLC [%] |
| --- | --- | --- | --- | --- |
| [18F]SiFA*lin‑*TATE | 59 | 59 | 98 | 98 |
| [177Lu]Lu-DOTA‑TATE | - | ≥99 | ≥99 | ≥99 |
| [18F]Lu-rhTATE4 | 55 | 38 | 98 | 99 |
| **[177Lu]Lu-rhTATE4** | - | 99 | 99 | 99 |

**Table S4**: Summary of *in vitro* data, including lipophilicity (logDph7.4, n=6), human serum albumin binding (HSA, n=1), binding affinity (IC50, n=3), and stability studies in human serum (% intact tracer, n=3) after 1 h (18F‑labelled, except for [177Lu]Lu-DOTA‑TATE) and 24 h (177Lu‑labelled) incubation at 37 °C.

| Compound | log*D*ph=7.4 | | HSA [%] | *IC*50  [nM] | Intact tracer  [%] | |
| --- | --- | --- | --- | --- | --- | --- |
| 18F | 177Lu | 1 h | 24 h |
| [nat/177Lu]Lu-DOTA‑TATE | - | 3.70 ± 0.05 | 51 | 7.24 ± 0.91 | ≥99 ± 0.0 | 98 ± 3.0 |
| [nat/18F]SiFA*lin*‑TATE | 1.41 ± 0.07 | - | 92 | 7.46 ± 1.40 | 98 ± 0.0 | - |
| **[nat/18F][nat/177Lu]-rhTATE4** | 1.42 ± 0.05 | 1.70 ± 0.06 | 95 | 9.32 ± 0.49 | ≥99 ± 0.0 | 91 ± 2.0 |

**Table S5**: Biodistribution of **[nat/18F]Lu-rhTATE4** in selected organs [%ID/g] at 1 h, 6 h and 24 h p.i. in AR42J tumor-bearing female CD1-nu/nu mice. * Out of linear regression of the device.

| Organ | 18F-labelled | | 177Lu-labelled | | |
| --- | --- | --- | --- | --- | --- |
| 1 h (n=3) | 1 h block (n=1) | 1 h (n=5) | 6 h (n=6) | 24 h (n=5) |
| Blood | 4.88 ± 0.23 | 6.13 | 2.70 ± 0.38 | 0.32 ± 0.13 | 0.04 ± 0.02 |
| Heart | 1.38 ± 0.08 | 1.57 | 0.91 ± 0.13 | 0.15 ± 0.05* | 0.05 ± 0.02 |
| Lung | 6.87 ± 0.21 | 6.34 | 7.57 ± 0.93 | 3.37 ± 1.68 | 1.30 ± 0.68 |
| Liver | 5.47 ± 0.47 | 6.26 | 3.11 ± 0.41 | 0.53 ± 0.28 | 0.19 ± 0.09 |
| Spleen | 1.34 ± 0.08 | 1.27 | 1.17 ± 0.39 | 0.49 ± 0.29 | 0.16 ± 0.10 |
| Pancreas | 11.65 ± 0.51 | 0.75 | 8.66 ± 3.93 | 1.05 ± 0.37 | 0.26 ± 0.18 |
| Stomach | 10.63 ± 0.99 | 2.50 | 9.30 ± 2.43 | 5.08 ± 2.43 | 2.14 ± 0.98 |
| Intestine | 2.50 ± 0.20 | 1.83 | 3.14 ± 1.50 | 2.83 ± 1.52 | 0.63 ± 0.43 |
| Kidney | 26.88 ± 1.49 | 40.30 | 14.80 ± 1.95 | 1.93 ± 0.70 | 0.55 ± 0.26 |
| Adrenal gland | 3.27 ± 0.39 | 1.98 | 2.67 ± 0.52* | 0.93 ± 0.38* | 0.22 ± 0.14 |
| Muscle | 0.34 ± 0.03 | 0.50 | 0.27 ± 0.06* | 0.07 ± 0.06* | 0.01 ± 0.01 |
| Bone + marrow | 1.74 ± 0.45 | 1.56 | 1.97 ± 0.43* | 0.77 ± 0.45* | 1.31 ± 0.68 |
| Bone | 0.56 ± 0.29 | 0.89 | - | - | - |
| Tumor | 53.58 ± 5.51 | 1.96 | 32.15 ± 8.55 | 22.97 ± 12.04 | 10.32 ± 7.04 |

**Table S6:** T/B ratio of **[18F]Lu-rhTATE4** and **[177Lu]Lu-rhTATE4** in selected organs [%ID/g] at 1 h, 6 h and 24 h p.i. in AR42J tumor-bearing female CD1-nu/nu mice. * Out of linear regression of the device.

| Organ | 18F-labelled | 177Lu-labelled | | |
| --- | --- | --- | --- | --- |
| 1 h (n=3) | 1 h (n=5) | 6 h (n=6) | 24 h (n=5) |
| Blood | 10.87 ± 0.78 | 11.82 ± 2.52 | 68.35 ± 27.52 | 209.44 ± 17.56 |
| Heart | 38.49 ± 5.26 | 35.26 ± 7.94 | 146.24 ± 50.23* | 152.49 ± 84.74 |
| Lung | 7.37 ± 0.97 | 4.20 ± 0.83 | 7.80 ± 2.28 | 17.24 ± 20.16 |
| Liver | 9.09 ± 1.73 | 10.15 ± 1.61 | 49.52 ± 24.92 | 62.47 ± 33.76 |
| Spleen | 40.13 ± 4.45 | 28.36 ± 3.14 | 48.85 ± 13.13 | 89.06 ± 43.70 |
| Pancreas | 4.54 ± 0.54 | 4.17 ± 1.24 | 20.17 ± 5.60 | 51.80 ± 46.97 |
| Stomach | 4.86 ± 0.26 | 3.67 ± 1.23 | 4.48 ± 0.55 | 9.38 ± 10.45 |
| Intestine | 21.31 ± 3.54 | 12.34 ± 5.11 | 8.96 ± 2.00 | 16.79 ± 6.98 |
| Kidney | 1.85 ± 0.26 | 2.14 ± 0.38 | 11.58 ± 5.41 | 122.78 ± 213.46 |
| Adrenal gland | 17.33 ± 1.73 | 12.44 ± 4.32* | 24.09± 8.58* | 162.17 ± 200.05 |
| Muscle | 143.62 ± 24.52 | 118.32 ± 24.68* | 542.02 ± 396.48* | 368.79 ± 247.24 |
| Bone + marrow | 31.61 ± 6.12 | 16.24 ± 1.60* | 31.16 ± 15.29* | 12.66 ± 5.43 |
| Bone | 77.52 ± 27.54 | - | - | - |

## REFERENCES

[1] S. Deiser, S. Fenzl, V. König, M. Drexler, L. M. Smith, M. E. George, R. Beck, T. H. Witney, S. Inoue, A. Casini, (SiFA) SeFe: A Hydrophilic Silicon-Based Fluoride Acceptor Enabling Versatile Peptidic Radiohybrid Tracers, *Journal of Medicinal Chemistry*,**2024**, *67*, 14077-14094.

[2] K. Valko, S. Nunhuck, C. Bevan, M. H. Abraham, D. P. Reynolds, Fast Gradient HPLC Method to Determine Compounds Binding to Human Serum Albumin. Relationships with Octanol/Water and Immobilized Artificial Membrane Lipophilicity, *Journal of Pharmaceutical Sciences*,**2003**, *92*, 2236-2248.

[3] K. Yamazaki, M. Kanaoka, Computational prediction of the plasma protein‐binding percent of diverse pharmaceutical compounds, *Journal of Pharmaceutical Sciences*,**2004**, *93*, 1480-1494.

[4] T. Günther, N. Holzleitner, D. Di Carlo, N. Urtz-Urban, C. Lapa, H.-J. Wester, in *Pharmaceutics, Vol. 15*, **2023**.
